# Supplementary material for: Auroral alert version 1.0: two-step automatic detection of sudden aurora intensification from all-sky JPEG images
Source: Copernicus journal article supplement (doi:10.5194/gi-12-71-2023), 2023-04-18
Supplement: Supplementary file 1 [file gi-12-71-2023-supplement.zip]

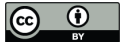

## *Supplement of*

# **Auroral alert version 1.0: two-step automatic detection of sudden aurora intensification from all-sky JPEG images**

**Masatoshi Yamauchi and Urban Brändström**

*Correspondence to:* Masatoshi Yamauchi (m.yamauchi@irf.se)

- gi-12-71-2023-supplement-title-page.pdf
- python\_program
  - aurora\_alert2021.py
  - judge\_aurora\_ASC2021.py
  - nowcast\_index2021.py
  - nowcast\_mindex\_main2021

The copyright of individual parts of the supplement might differ from the article licence.
